# Supplementary material
Source: Springer Nature journal article supplement (https://www.springermedizin.de/resource/supplementary/12889_2014_7414_MOESM2_ESM.pdf/9497192)
Supplement: MOESM2 [file 9497192]

## **Additional File 1**

Additional analyses and components have been included in supplemental materials. A list of these elements is provided below. Table numbers are sequential based on numbering in the full manuscript. Table 5. provides the same results that are presented in table two and in addition for all derived variables available within the WASABE. There are over 120 derived variables are included in this full table of inter-rater reliability along with mean estimates of percent agreement by domain. Tables 5 and 6 provide results of the descriptive statistics for three social environmental features including sings of neighborhood and cultural events, security and warning signs and visibility of individuals actively engaging in walking and biking. These data provide further illustration of the discriminatory elements of the WASABE tool.

### **Table of Contents Additional File 1**

Table 5. Percent Agreement of Select Items by Domain (Full)

Table 6. Sociodemographic Characteristics and Prevalence of Social Features Surrounding 2010 Participant Households

Table 7. Prevalence of Social Features Surrounding 2010 Participant Households by Strata of Health Behaviors, Neighborhood Perceptions, and Census Block Group SES and Urbanicity

**Table 5. Percent Agreement of Select Items by Domain (Full)**

| Domain                              | Features            | Items                                           | % Agree | Upper (95% CI) | Lower (95% CI) | Mean |
|-------------------------------------|---------------------|-------------------------------------------------|---------|----------------|----------------|------|
| <b>Neighborhood Characteristics</b> |                     |                                                 |         |                |                |      |
|                                     | Positive Aesthetics | Variation in building materials and colors      | 66.7    | 65.3           | 68.2           | 85.1 |
|                                     |                     | Vegetation                                      | 70.5    | 69.0           | 71.9           |      |
|                                     |                     | Shade trees                                     | 72.3    | 70.9           | 73.7           |      |
|                                     |                     | Street lights                                   | 71.3    | 69.9           | 72.7           |      |
|                                     | Public Amenities    | Public trash cans                               | 95.7    | 95.1           | 96.3           |      |
|                                     |                     | Seating / benches                               | 94.7    | 94.0           | 95.4           |      |
|                                     |                     | Bike racks                                      | 97.1    | 96.6           | 97.6           |      |
|                                     |                     | Public art                                      | 98.5    | 98.1           | 98.9           |      |
|                                     |                     | Public attractive natural features              | 95.1    | 94.4           | 95.7           |      |
|                                     |                     | Neighborhood social / cultural message or event | 79.7    | 78.5           | 81.0           |      |
|                                     |                     | Political message or event                      | 81.2    | 80.0           | 82.4           |      |
|                                     |                     | Religious message or event                      | 97.2    | 96.7           | 97.8           |      |
|                                     |                     | Security warning signs                          | 81.9    | 80.7           | 83.0           |      |
|                                     |                     | Negative Aesthetics                             |         |                |                |      |
|                                     |                     | Buildings in poor condition                     | 76.4    | 75.1           | 77.8           |      |
|                                     |                     | Vegetation neglected                            | 70.8    | 69.3           | 72.2           |      |
|                                     |                     | Careless / harmless litter                      | 53.5    | 52.0           | 55.1           |      |
|                                     |                     | Hazardous litter                                | 92.2    | 91.4           | 93.1           |      |
|                                     |                     | Cigarette butts                                 | 69.1    | 67.7           | 70.6           |      |
|                                     |                     | Broken / boarded up windows                     | 98.0    | 97.6           | 98.5           |      |
|                                     | Advertisements      | Fast food advertisements                        | 99.8    | 99.7           | 99.9           |      |
|                                     |                     | Alcohol advertisements                          | 98.1    | 97.6           | 98.5           |      |
|                                     |                     | Tobacco advertisements                          | 99.9    | 99.9           | 100.0          |      |
|                                     |                     | Graffiti                                        | 98.2    | 97.8           | 98.6           |      |
| <b>Transportation Environment</b>   |                     |                                                 |         |                |                |      |
|                                     | Transportation      | Sidewalks                                       | 80.9    | 79.7           | 82.1           | 84.5 |
|                                     |                     | Speed limit                                     | 81.9    | 77.7           | 86.1           |      |
|                                     |                     | Public transportation                           | 87.5    | 86.4           | 88.5           |      |
|                                     |                     | Pedestrian safety signs (segment)               | 90.6    | 89.7           | 91.5           |      |
|                                     |                     | On-street parking with bulb-out (segment)       | 99.1    | 98.8           | 99.4           |      |
|                                     |                     | On-street parking without bulb-out (segment)    | 87.4    | 86.3           | 88.4           |      |
|                                     |                     | On-street paved, marked bike lane               | 94.6    | 93.9           | 95.3           |      |

|                                  |                     |                                               |       |       |       |      |
|----------------------------------|---------------------|-----------------------------------------------|-------|-------|-------|------|
|                                  |                     | On-street bike lane obstructions              | 82.3  | 74.7  | 89.9  |      |
|                                  |                     | On-street bike lane markings worn off         | 83.5  | 75.6  | 91.4  |      |
|                                  |                     | Outermost lane wide enough                    | 64.5  | 62.9  | 66.1  |      |
|                                  |                     | Outermost land obstructions                   | 67.9  | 65.1  | 70.8  |      |
|                                  |                     | Buffer between street and sidewalk            | 93.1  | 92.2  | 94.0  |      |
|                                  |                     | Major misalignments / cracks in sidewalk      | 85.2  | 83.9  | 86.5  |      |
|                                  | Street Connectivity | Traffic lanes (segment)                       | 89.8  | 88.9  | 90.8  |      |
|                                  |                     | Pedestrian crosswalks (segment)               | 99.5  | 99.3  | 99.7  |      |
|                                  |                     | Pedestrian crosswalks worn off (segment)      | 100.0 | 100.0 | 100.0 |      |
|                                  |                     | Walk / Don't walk signals (segment)           | 100.0 | 100.0 | 100.0 |      |
|                                  |                     | Ramps / curb cuts (segment)                   | 99.0  | 98.6  | 99.3  |      |
|                                  |                     | Medians / pedestrian islands (segment)        | 97.6  | 97.1  | 98.1  |      |
|                                  |                     | Pushbutton on Median (segment)                | 99.9  | 99.9  | 100.0 |      |
|                                  |                     | Traffic calming devices (segment)             | 98.7  | 98.3  | 99.0  |      |
|                                  |                     | Traffic lanes (intersection)                  | 56.3  | 54.1  | 58.5  |      |
|                                  |                     | Pedestrian crosswalks (intersection)          | 73.3  | 71.3  | 75.2  |      |
|                                  |                     | Pedestrian crosswalks worn off (intersection) | 91.0  | 89.8  | 92.3  |      |
|                                  |                     | Intersection type                             | 54.4  | 49.0  | 59.7  |      |
|                                  |                     | Walk / Don't walk signals (intersection)      | 91.6  | 90.4  | 92.8  |      |
|                                  |                     | Ramps / curb cuts (intersection)              | 48.3  | 46.1  | 50.5  |      |
|                                  |                     | Pedestrian safety signs (intersection)        | 75.9  | 74.0  | 77.8  |      |
|                                  |                     | Medians / pedestrian islands (intersection)   | 93.7  | 92.6  | 94.8  |      |
|                                  |                     | Pushbutton on Median (intersection)           | 94.0  | 90.4  | 97.6  |      |
|                                  |                     | Traffic calming devices (intersection)        | 96.9  | 96.1  | 97.7  |      |
|                                  |                     | Traffic volume (intersection)                 | 46.5  | 44.3  | 48.7  |      |
| <b>Destinations and Land Use</b> |                     |                                               |       |       |       |      |
|                                  | Land Use Diversity  | Street type                                   | 91.4  | 90.5  | 92.3  | 96.5 |
|                                  |                     | Single family homes                           | 85.7  | 84.6  | 86.8  |      |

|                                     |                            |                                                  |       |       |       |  |
|-------------------------------------|----------------------------|--------------------------------------------------|-------|-------|-------|--|
|                                     |                            | Multi-unit homes (2-6 units)                     | 79.5  | 78.2  | 80.7  |  |
|                                     |                            | Apartment building / complex (> 6 units)         | 92.4  | 91.6  | 93.3  |  |
|                                     |                            | Apartment over retail                            | 97.0  | 96.5  | 97.6  |  |
|                                     |                            | Mobile home or trailer park / community          | 100.0 | 100.0 | 100.0 |  |
|                                     |                            | Other residential buildings                      | 99.7  | 99.5  | 99.8  |  |
|                                     |                            | Farm complexes                                   | 99.9  | 99.9  | 100.0 |  |
|                                     |                            | Off-road walking / biking trails or paths        | 95.3  | 94.6  | 95.9  |  |
|                                     |                            | Manufacturing facilities                         | 99.4  | 99.2  | 99.7  |  |
|                                     |                            | Schools                                          | 97.7  | 97.2  | 98.2  |  |
|                                     |                            | Parking lots / garages                           | 93.8  | 93.0  | 94.5  |  |
|                                     |                            | Parks or designated green spaces                 | 93.5  | 92.7  | 94.3  |  |
|                                     |                            | Undeveloped land / farmlands / woodlands         | 95.2  | 94.6  | 95.9  |  |
|                                     |                            | Railroad (segment)                               | 99.8  | 99.6  | 99.9  |  |
|                                     |                            | Number of stories of tallest building in segment | 72.6  | 71.1  | 74.0  |  |
|                                     |                            | Type of building (tallest building)              | 85.1  | 84.0  | 86.2  |  |
|                                     |                            | Topography                                       | 81.0  | 79.8  | 82.2  |  |
|                                     |                            | Abandoned buildings                              | 99.3  | 99.0  | 99.6  |  |
| <b>Non-Residential Destinations</b> |                            |                                                  |       |       |       |  |
|                                     | Recreational               | Off-road walking / biking trails or paths        | 95.3  | 94.6  | 95.9  |  |
|                                     |                            | Schools                                          | 97.7  | 97.2  | 98.2  |  |
|                                     |                            | Indoor fitness facilities                        | 99.9  | 99.8  | 100.0 |  |
|                                     |                            | Sports / playing fields, courts, or tracks       | 96.8  | 96.3  | 97.4  |  |
|                                     |                            | Playgrounds or splash pads                       | 96.5  | 95.9  | 97.1  |  |
|                                     |                            | Golf courses                                     | 100.0 | 100.0 | 100.0 |  |
|                                     |                            | Pools (indoor or outdoor)                        | 100.0 | 100.0 | 100.0 |  |
|                                     |                            | Other recreational facilities                    | 98.8  | 98.5  | 99.2  |  |
|                                     | Alcohol and Liquor Outlets | Bars / night clubs                               | 99.2  | 98.9  | 99.5  |  |
|                                     |                            | Liquor / tobacco stores                          | 99.5  | 99.3  | 99.7  |  |
|                                     |                            | Wine stores                                      | 99.9  | 99.8  | 100.0 |  |
|                                     | Restaurants                | Fast food restaurants                            | 98.9  | 98.6  | 99.2  |  |
|                                     |                            | Other restaurants                                | 97.2  | 96.7  | 97.8  |  |
|                                     |                            | Coffee shops                                     | 99.6  | 99.4  | 99.8  |  |
|                                     |                            | Specialty / ethnic food stores                   | 99.8  | 99.6  | 99.9  |  |
|                                     | Food Outlets               | Food supermarkets or grocery                     | 99.9  | 99.8  | 100.0 |  |

|                           |                         |                                                       |       |       |       |      |
|---------------------------|-------------------------|-------------------------------------------------------|-------|-------|-------|------|
|                           |                         | stores                                                |       |       |       |      |
|                           |                         | Convenience stores or gas station stores              | 99.8  | 99.6  | 99.9  |      |
|                           |                         | Gas stations                                          | 99.7  | 99.6  | 99.9  |      |
|                           | Health Care             | Pharmacies                                            | 99.4  | 99.2  | 99.6  |      |
|                           |                         | Health care facilities                                | 98.7  | 98.4  | 99.1  |      |
|                           | Retail                  | Retail stores                                         | 97.2  | 96.7  | 97.8  |      |
|                           |                         | Indoor malls, department stores, or "big box" stores  | 100.0 | 100.0 | 100.0 |      |
|                           |                         | Service providers                                     | 93.2  | 92.4  | 94.0  |      |
|                           | Fitness                 | Indoor fitness facilities                             | 99.9  | 99.8  | 100.0 |      |
|                           |                         | Cultural entertainment facilities                     | 99.1  | 98.8  | 99.4  |      |
|                           |                         | Other entertainment facilities                        | 99.9  | 99.8  | 100.0 |      |
|                           | Religious               | Non-religious community centers                       | 99.4  | 99.2  | 99.6  |      |
|                           |                         | Church, synagogue, mosque, or other religious centers | 98.0  | 97.6  | 98.5  |      |
|                           |                         | Educational facilities                                | 97.1  | 96.6  | 97.6  |      |
|                           |                         | Government facilities                                 | 98.9  | 98.6  | 99.2  |      |
|                           |                         | Transportation facilities                             | 99.8  | 99.7  | 99.9  |      |
|                           |                         | Hotels, motels, or inns                               | 99.0  | 98.7  | 99.3  |      |
|                           | Office and Work Space   | Office space                                          | 98.3  | 97.9  | 98.7  |      |
|                           |                         | Warehouses                                            | 98.3  | 97.9  | 98.7  |      |
| <b>Social Environment</b> |                         |                                                       |       |       |       |      |
|                           | Signs of Social Capital | Neighborhood social / cultural message or event       | 79.7  | 78.5  | 81.0  | 81.1 |
|                           |                         | Political message or event                            | 81.2  | 80.0  | 82.4  |      |
|                           |                         | Religious message or event                            | 97.2  | 96.7  | 97.8  |      |
|                           |                         | Security warning signs                                | 81.9  | 80.7  | 83.0  |      |
|                           | Active Engagement       | People engaging in other physical activities          | 85.9  | 84.8  | 87.0  |      |
|                           |                         | People walking                                        | 67.4  | 65.9  | 68.9  |      |
|                           |                         | People biking                                         | 75.0  | 73.6  | 76.3  |      |

**Table 6. Sociodemographic Characteristics and Prevalence of Social Features Surrounding 2010 Participant Households**

|                            | Total population (n =939) | Total population     | Neighborhood Social or Cultural Message | Security Warnings or Signs  | Active Engagement – People walking or Biking | Fitness Centers             |
|----------------------------|---------------------------|----------------------|-----------------------------------------|-----------------------------|----------------------------------------------|-----------------------------|
| Individual Demographics    | n                         | (weighted %, 95% CI) | (row %, 95% CI, Chi Square)             | (row %, 95% CI, Chi Square) | (row %, 95% CI, Chi Square)                  | (row %, 95% CI, Chi Square) |
| <b>Gender</b>              |                           |                      | 0.4090                                  | 0.4637                      | <b>0.0749</b>                                | 0.8699                      |
| Male                       | 421                       | 50.1 (47.9-52.3)     | 64.3 (56.5-72.2)                        | 54.6 (46.3-62.9)            | 68.2 (59.3-77.2)                             | 7.9 (2.9-12.9)              |
| Female                     | 518                       | 49.9 (47.7-52.3)     | 62.7 (55.2-70.3)                        | 55.9 (47.9-63.9)            | 71.6 (64.1-79.1)                             | 7.4 (4.3-10.5)              |
| <b>Age</b>                 |                           |                      | <b>0.0198</b>                           | 0.7221                      | <b>0.0004</b>                                | 0.2100                      |
| 21-29                      | 155                       | 19.8 (14.6-24.9)     | 71.7 (57.8-85.7)                        | 61.4 (44.5-78.2)            | 83.9 (75.0-92.9)                             | 13.3 (3.2-23.4)             |
| 30-39                      | 148                       | 18.0 (14.6-21.5)     | 75.0 (66.3-83.7)                        | 51.6 (39.6-63.6)            | 75.4 (66.7-84.0)                             | 6.8 (1.7-11.8)              |
| 40-49                      | 204                       | 22.1 (18.5-25.7)     | 60.0 (48.7-71.4)                        | 55.0 (44.9-65.0)            | 61.7 (48.0-75.3)                             | 6.1 (2.5-9.7)               |
| 50-64                      | 311                       | 29.6 (25.3-33.9)     | 56.2 (45.6-66.8)                        | 53.2 (43.7-62.8)            | 64.0 (53.9-74.1)                             | 6.2 (2.1-10.2)              |
| ≤ 65                       | 121                       | 10.5 (8.5-12.5)      | 56.6 (42.6-70.6)                        | 56.4 (44.0-68.8)            | 68.1 (55.9-80.4)                             | 6.0 (0.2 -11.8)             |
| <b>Race/Ethnicity</b>      |                           |                      | <b>0.0002</b>                           | <b>&lt;0.0001</b>           | <b>0.0001</b>                                | 0.5862                      |
| White (Non-Hispanic)       | 832                       | 87.5 ((84.6-90.3)    | 61.2 (53.3-69.1)                        | 52.0 (43.9-60.1)            | 67.2 (58.6-75.9)                             | 7.3 (4.2-10.4)              |
| Non-white                  | 104                       | 12.5 (9.7-15.4)      | 80.7 (72.2-89.3)                        | 78.5 (68.4-88.7)            | 88.4 (80.6-96.2)                             | 10.2 (0.00-22.2)            |
| <b>Marital status</b>      |                           |                      | <b>0.0001</b>                           | <b>0.0330</b>               | <b>&lt;0.0001</b>                            | <b>0.0004</b>               |
| Married, with partner      | 611                       | 65.1 (59.4-70.8)     | 57.9 (49.6-66.3)                        | 51.0 (42.6-59.4)            | 64.3 (54.6-73.9)                             | 4.6 (1.7-7.5)               |
| Never married              | 176                       | 21.1 (15.7-26.5)     | 80.8 (70.3-91.2)                        | 67.1 (53.5-80.8)            | 85.9 (78.7-93.2)                             | 17.5 (7.7-27.2)             |
| Single (divorced, widowed) | 150                       | 13.8 (10.9-16.6)     | 64.7 (54.3-75.2)                        | 58.3 (45.8-70.7)            | 72.1 (60.8-83.3)                             | 7.2 (1.3-13.1)              |
| <b>Education status</b>    |                           |                      | 0.0995                                  | 0.4692                      | <b>0.0204</b>                                | 0.5843                      |
| High School or less        | 236                       | 24.7 (21.2-28.2)     | 55.5 (43.8-67.2)                        | 56.8 (47.1-66.5)            | 61.1 (48.3-73.9)                             | 9.4 (4.2-14.5)              |
| Some college               | 397                       | 43.1 (39.0-47.3)     | 64.4 (56.0-72.8)                        | 57.5 (48.1-67.0)            | 69.7 (60.9-78.5)                             | 7.1 (2.8-11.4)              |
| College or beyond          | 304                       | 32.2 (27.1-37.4)     | 69.1 (58.6-79.6)                        | 51.5 (40.5-62.5)            | 76.8 (67.7-85.8)                             | 7.1 (4.2-10.1)              |
| <b>Family Income</b>       |                           |                      | 0.3681                                  | <b>0.0458</b>               | <b>0.0119</b>                                | <b>0.0014</b>               |
| <100% of FPL               | 105                       | 12.5 (9.0-15.9)      | 75.4 (62.9-87.9)                        | 67.7 (54.1-81.2)            | 82.5 (73.1-91.9)                             | 13.3 (0.9-25.8)             |
| 100-199% FPL               | 144                       | 15.5 (12.1-18.8)     | 60.5 (46.8-74.2)                        | 58.6 (46.0-71.1)            | 72.5 (62.2-82.8)                             | 16.2 (6.9-25.5)             |
| 200-399% FPL               | 327                       | 33.5 (29.6-37.5)     | 60.9 (52.7-69.0)                        | 50.9 (42.0-59.8)            | 64.4 (54.4-74.3)                             | 4.3 (1.8-6.7)               |
| 400%+ FPL                  | 314                       | 33.1 (28.9-37.4)     | 63.3 (52.0-74.5)                        | 51.3 (41.3-61.2)            | 68.1 (57.5-78.6)                             | 4.7 (1.9-7.6)               |
| Unknown                    | 49                        | 5.4 (3.8-7.1)        | 63.2 (44.0-82.4)                        | 68.6 (49.4-87.8)            | 79.2 (66.6-91.9)                             | 9.0 (0.4-17.6)              |

**Table 7. Prevalence of Social Features Surrounding 2010 Participant Households by Strata of Health Behaviors, Neighborhood Perceptions, and Census Block Group SES and Urbanicity**

|                                                                      | Total population (n =939) |                      | Neighborhood Social or Cultural Message | Security Warnings or Signs  | Active Engagement – People walking or Biking | Fitness Centers             |
|----------------------------------------------------------------------|---------------------------|----------------------|-----------------------------------------|-----------------------------|----------------------------------------------|-----------------------------|
| Health Promoting Behaviors                                           | n                         | (weighted %, 95% CI) | (row %, 95% CI, Chi Square)             | (row %, 95% CI, Chi Square) | (row %, 95% CI, Chi Square)                  | (row %, 95% CI, Chi Square) |
| <b>Meet Physical Activity Recommendations (&gt;600 MET/MIN/WEEK)</b> |                           |                      | 0.3651                                  | 0.4178                      | 0.7586                                       | <b>0.0469</b>               |
| Yes                                                                  | 716                       | 76.6 (73.2-80.0)     | 62.8 (54.9-70.7)                        | 54.4 (46.5-62.3)            | 69.7 (61.5-77.9)                             | 6.8 (3.6-10.0)              |
| No                                                                   | 223                       | 23.4 (20.0-26.8)     | 65.9 (57.7-74.1)                        | 58.0 (47.0-68.9)            | 70.7 (61.3-80.2)                             | 10.4 (5.9-14.9)             |
| <b>Servings of Fruits and Vegetables (4-5 daily)</b>                 |                           |                      | 0.4905                                  | 0.6345                      | 0.5296                                       | <b>0.0287</b>               |
| Yes                                                                  | 155                       | 17.1 (13.8-20.4)     | 66.0 (53.2-78.7)                        | 52.7 (41.5-63.8)            | 71.9 (60.8-83.0)                             | 3.0 (0.2-5.7)               |
| No                                                                   | 683                       | 82.9 (79.6-86.2)     | 62.0 (53.9-70.1)                        | 55.2 (46.5-63.8)            | 69.0 (60.2-77.7)                             | 8.4 (4.4-12.4)              |
| <b>Neighborhood Perceptions</b>                                      |                           |                      |                                         |                             |                                              |                             |
| <b>Many destinations within easy walking distance</b>                |                           |                      | <b>&lt;0.0001</b>                       | <b>0.0077</b>               | <b>&lt;0.0001</b>                            | <b>0.0200</b>               |
| Agree                                                                | 445                       | 58.7 (50.3-67.1)     | 77.7 (70.3-85.0)                        | 61.3 (50.9-71.7)            | 87.6 (82.8-92.4)                             | 10.3 (5.3-15.3)             |
| Disagree                                                             | 391                       | 41.3 (32.9-49.7)     | 41.4 (32.4-50.4)                        | 45.8 (36.6-54.9)            | 43.8 (32.0-55.6)                             | 3.5 (0.3-6.7)               |
| <b>Many interesting things to look at</b>                            |                           |                      | <b>0.0220</b>                           | 0.9888                      | <b>0.0031</b>                                | 0.3794                      |
| Agree                                                                | 645                       | 78.6 (75.0-82.3)     | 64.9 (56.7-73.1)                        | 54.8 (46.0-63.7)            | 72.3 (64.0-80.6)                             | 7.9 (4.4-11.5)              |
| Disagree                                                             | 190                       | 21.4 ((17.7-25.0)    | 54.9 (44.2-65.6)                        | 54.8 (44.8-64.7)            | 59.0 (46.4-71.5)                             | 5.9 (1.3-10.5)              |
| <b>Community Well Maintained</b>                                     |                           |                      | 0.8769                                  | <b>0.0211</b>               | <b>0.0704</b>                                | 0.8972                      |
| Agree                                                                | 747                       | 89.6 (87.3-92.0)     | 62.6 (54.2-71.0)                        | 53.4 (45.0-61.8)            | 68.5 (59.7-77.3)                             | 7.2 (3.9-10.6)              |
| Disagree                                                             | 84                        | 10.4 (8.0-12.7)      | 63.5 (51.1-75.9)                        | 68.0 (55.1-80.8)            | 78.4 (67.1-89.8)                             | 7.7 (0.0-16.2)              |
| <b>Easy Access to Fresh Fruits and Vegetables</b>                    |                           |                      | 0.6122                                  | 0.4904                      | 0.5188                                       | 0.4852                      |
| Agree                                                                | 713                       | 86.6 (83.2-90.0)     | 63.1 (54.8-71.4)                        | 54.3 (46.0-62.6)            | 69.9 (61.4-78.5)                             | 7.2 (4.2-10.2)              |
| Disagree                                                             | 123                       | 13.4 (10.0-16.8)     | 59.9 (46.7-73.2)                        | 58.5 (44.9-55.1)            | 66.7 (53.6-79.7)                             | 9.3 (1.1 -17.5)             |
| <b>Census Block Group Characteristics</b>                            |                           |                      |                                         |                             |                                              |                             |
| <b>Economic Hardship</b>                                             |                           |                      | <b>0.0012</b>                           | <b>0.0044</b>               | <b>0.0037</b>                                | <b>0.0066</b>               |
| Low                                                                  | 362                       | 39.0 (28.2-49.9)     | 73.4 (61.7-85.2)                        | 65.0 (54.5-75.5)            | 80.0 (69.1-90.9)                             | 4.2 (0.7-7.8)               |
| Medium                                                               | 312                       | 33.1 (21.2-44.9)     | 45.5 (34.0-57.0)                        | 36.8 (21.4-52.2)            | 52.3 (36.3-68.4)                             | 4.0 (0.0-8.3)               |
| High                                                                 | 265                       | 27.9 (19.5-36.2)     | 71.1 (58.8-83.4)                        | 63.5 (49.6-77.5)            | 76.7 (65.3-88.1)                             | 16.8 (6.2-27.5)             |
| <b>Urbanicity (Census 2010 urbanized areas &amp; urban clusters)</b> |                           |                      | <b>&lt;0.0001</b>                       | <b>&lt;0.0001</b>           | <b>&lt;0.0001</b>                            | <b>0.0051</b>               |
| Urban                                                                | 587                       | 69.2 (60.2-78.1)     | 79.0 (71.9-86.1)                        | 65.4 (56.4-74.3)            | 90.0 (84.6-95.4)                             | 10.4 (6.1-14.8)             |
| Rural                                                                | 352                       | 30.8 (21.9-39.8)     | 28.9 (17.9-40.0)                        | 32.6 (20.8-44.4)            | 24.8 (15.0-34.5)                             | 1.4 (0.0-3.7)               |
